# Supplementary material for: Triphenylamine-based rhombimine macrocycles with solution interconvertable conformation
Source: Royal Society of Chemistry journal article supplement (doi:10.1039/c004999a), 2010-01-01
Supplement: c004999a.pdf [file c004999a.pdf]

## **Supporting Information**

### **Triphenylamine-based rhombimine macrocycles with solution interconvertible conformation**

Mircea Grigoras<sup>\*</sup>, Loredana Vacareanu, Teofilia Ivan and Gabriela Liliana Ailiesei

“P. Poni” Institute of Macromolecular Chemistry, 41A Gr. Ghica Voda Alley, 700487-Iasi, Romania;

<sup>\*</sup>e-mail: grim@icmpp.ro; Tel: +40-0232-217454 Fax: +40-0232-211299

### ***Materials***

Triphenylamine (Aldrich, 97%) and (1R,2R)-trans-1,2-diaminocyclohexane (**2**) (Aldrich, 98%) were used as received. Solvents were purchased from Aldrich source and were dried using the usual procedures. All manipulations of air/moisture-sensitive materials were handled under nitrogen atmosphere. 4,4'-Diformyl triphenylamine (**1a**) was synthesized by formylation of triphenylamine in presence of high excess of POCl<sub>3</sub>/DMF mixture [1,2]. Other derivatives: 4,4'-bis formyl 4''-bromo triphenylamine (**1b**) [3] and 4,4',4''-tris(p-formylphenyl)amine (**1c**) [1,2] were synthesized and purified according to the reported methods.

### ***Instrumentations***

The FT-IR spectra were recorded in KBr pellets on a Bruker Vertex 70 spectrometer, while UV-vis absorption spectra were obtained on a Specord 200 Analytik Jena spectrophotometer using 10 mm quartz cells. <sup>1</sup>H-NMR spectra were recorded at room temperature on a Bruker Avance DRX-400 spectrometer (400 MHz) as solutions in CDCl<sub>3</sub> and chemical shifts are reported in ppm and referred to TMS as internal standard. MS measurements were performed with a Mass Spectrometer model ESI-Q-ToF-MS Agilent 6520 (Electrospray Ionization Quadrupole–Time of Flight) and methanol/chloroform (1:3) as solvent. Thermal gravimetric analysis (TGA) was performed by means of a Mettler Toledo TGA-SDTA 851e device, in N<sub>2</sub> atmosphere, with a flow of 20 ml/min, and a heating speed of 10 K/min (25-850 °C range). DSC measurements were performed with a Mettler DSC-12E apparatus, in nitrogen.

## Experimental

### Synthesis of rhombimines

*(2R,3R,17R,18R)-1,4,10,16,19,25-hexaaza-10,25-diphenyl-(2,3:17,18)-dibutano-(6:9,11:14,21:24,26:29)-tetraetheno-(2H,3H,17H,18H)-tetrahydro-(30)-annulene (3a):*

A solution of dialdehyde **1a** (0.4457 g, 1.48 mmol) in CH<sub>2</sub>Cl<sub>2</sub> (5 ml) was added to a solution of *(1R,2R)-trans*-1,2-diaminocyclohexane **2** (0.1691 g, 1.48 mmol) in 5 ml dried CH<sub>2</sub>Cl<sub>2</sub> (20 mL) at room temperature and nitrogen atmosphere and stirred for 5 hours under gentle reflux. The solvent was evaporated and the crude product was completely dissolved in N,N-dimethylformamide at reflux and by fast cooling a gel-like system was obtained that was filtered to give colorless fine powder of **3a** in 85.7 % yield (0.48 g). Mp=325 °C (with decomposition).

<sup>1</sup>H-NMR (crude product) (CDCl<sub>3</sub>): 8.11 and 7.91 ppm (*CH=N*), 6.9-7.5 ppm (26H, aromatic protons from triphenyl amine rings), 3.35-3.22; 2.04; 1.87; 1.48 ppm (from cyclohexane) δ= 7.34 (d, J=8.8 Hz, 8H, nitrogen *meta* aromatic protons in =CH-C<sub>6</sub>H<sub>4</sub>-N-), 7.24 (t, J=8.0 Hz, 4H, *meta* protons in -N-C<sub>6</sub>H<sub>5</sub>), 7.03-7.06 (m, 6H, *ortho* and *para* protons in -N-C<sub>6</sub>H<sub>5</sub>), 6.97 (d, J=8.8 Hz, nitrogen *ortho* aromatic protons in =CH-C<sub>6</sub>H<sub>4</sub>-N), 3.22-3.24 (m, 4H, -CH-N=), 2.05 (d, J=11.6 Hz, 4H of C<sub>6</sub>H<sub>10</sub> ring), 1.88 (d, J=7.6 Hz, 8H of C<sub>6</sub>H<sub>10</sub> ring) and 1.48 (q, J=10.4 Hz, 4H of C<sub>6</sub>H<sub>10</sub> ring)

ESI-MS (m/z): 759.28: Calcd for C<sub>52</sub>H<sub>50</sub>N<sub>6</sub> =758. CHN (Found: C, 81.10; H, 6.78; N, 11.41. C<sub>52</sub>H<sub>50</sub>N<sub>6</sub> requires: C, 82.32; H, 6.60; N, 11.08.

Other imine macrocycles (**3b**, **3c**) were synthesized by the same procedure.

*(2R,3R,17R,18R)-1,4,10,16,19,25-hexaaza-10,25-di(p-bromophenyl)-(2,3:17,18)-dibutano-(6:9,11:14,21:24,26:29)-tetraetheno-(2H,3H,17H,18H)-tetrahydro-(30)-annulene (3b):*

Yield = 89.2 %. Recrystallized from tetrahydrofuran.  $^1\text{H-NMR}$  ( $\text{CDCl}_3$ ): 7.93 ppm (4H,  $\text{CH}=\text{N}$ ) 7.5-6.8 ppm (24H, aromatic protons), 3.24; 2.04; 1.88 and 1.48 (20H, from cyclohexane). ESI-MS ( $m/z$ ): 917.10 calcd for  $\text{C}_{52}\text{H}_{48}\text{Br}_2\text{N}_6$  =916. CHN (Found: C, 66.38; H, 5.51; N, 9.06; Br, 16.91.  $\text{C}_{52}\text{H}_{48}\text{Br}_2\text{N}_6$  (requires: C, 68.12; H, 5.24; N, 9.17; Br, 17.47).

*(2R,3R,17R,18R)-1,4,10,16,19,25-hexaaza-10,25-di(p-formylphenyl)-(2,3:17,18)-dibutano-(6:9,11:14,21:24,26:29)-tetraetheno-(2H,3H,17H,18H)-tetrahydro-(30)-annulene (3c)*: Yield = 74.5 %

$^1\text{H-NMR}$  ( $\text{CDCl}_3$ ) (crude product): 9.80 (2H, CHO), 8.14-7.90 ppm (4H,  $\text{CH}=\text{N}$ ), 7.6-6.9 ppm (24H, aromatic protons), 3.38-3.32; 1.92 and 1.49 ppm (20H, from cyclohexane). ESI-MS ( $m/z$ ): 816.35 Calcd for  $\text{C}_{54}\text{H}_{50}\text{N}_6\text{O}_2$  (815). CHN (Found: C, 77.3; H, 6.11; N, 10.20.  $\text{C}_{54}\text{H}_{50}\text{N}_6\text{O}_2$  requires: C, 79.55; H, 6.17; N, 10.34; O, 3.94).

Rhombamine derivative (**4a**) was obtained by reduction of the corresponding rhombimine (**3a**) with  $\text{NaBH}_4$  in THF/methanol mixture and product was separated by precipitation in water.  $^1\text{H-NMR}$  ( $\text{CDCl}_3$ ): 7.3-6.9 ppm (26H, aromatic protons), 4.0-3.5 ppm (8H,  $-\text{CH}_2-$ ), 2.4-1.0 ppm (12H,  $-\text{NH}-$  and cyclohexane).

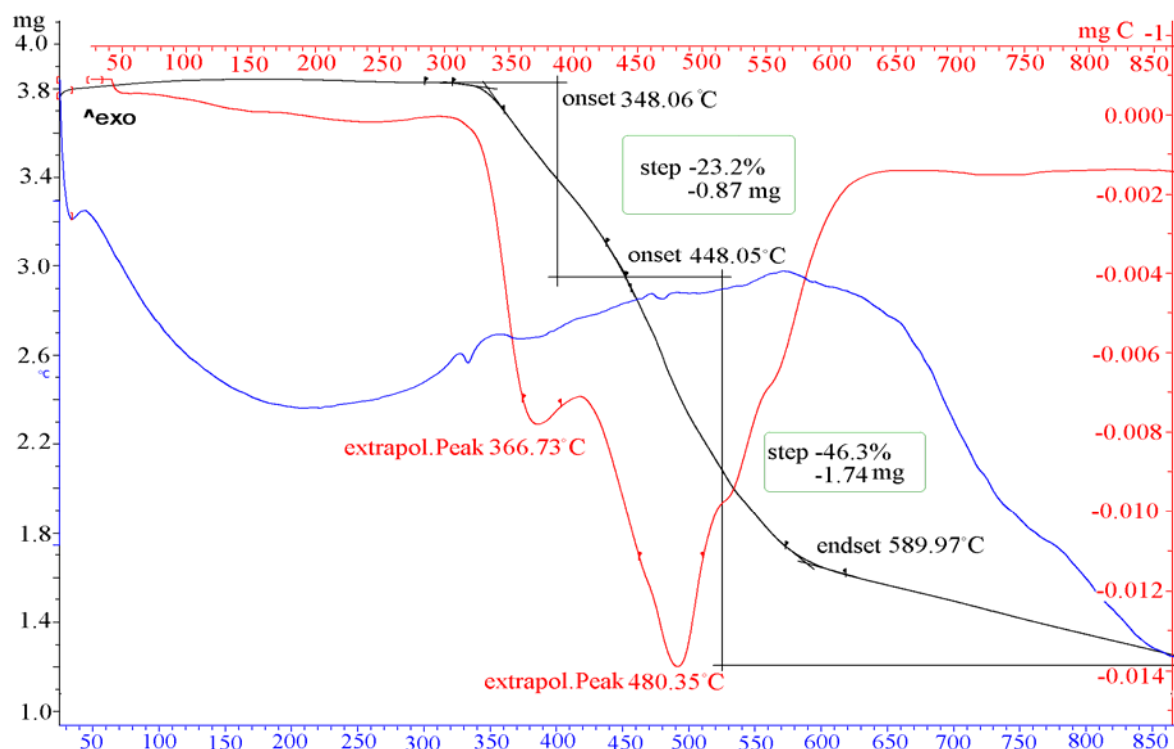

Figure S1. TG, DTG and DTA curves for **3a**.

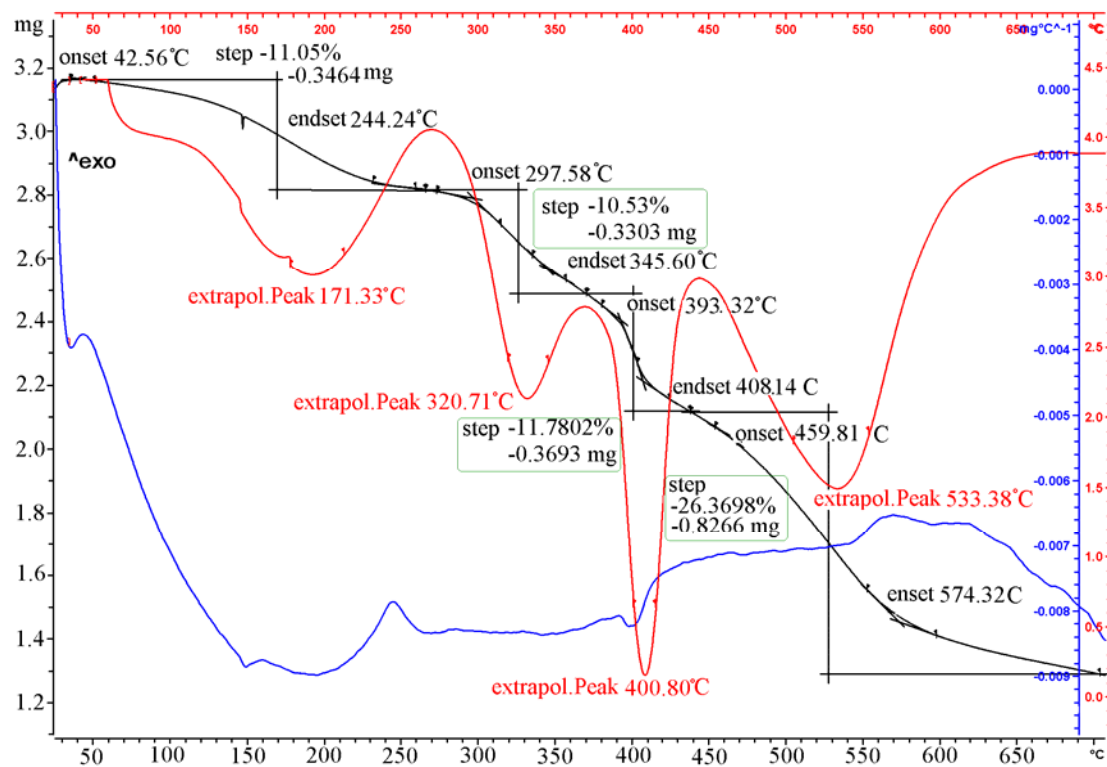

Figure S2. TG, DTG and DTA curves for **3b**.

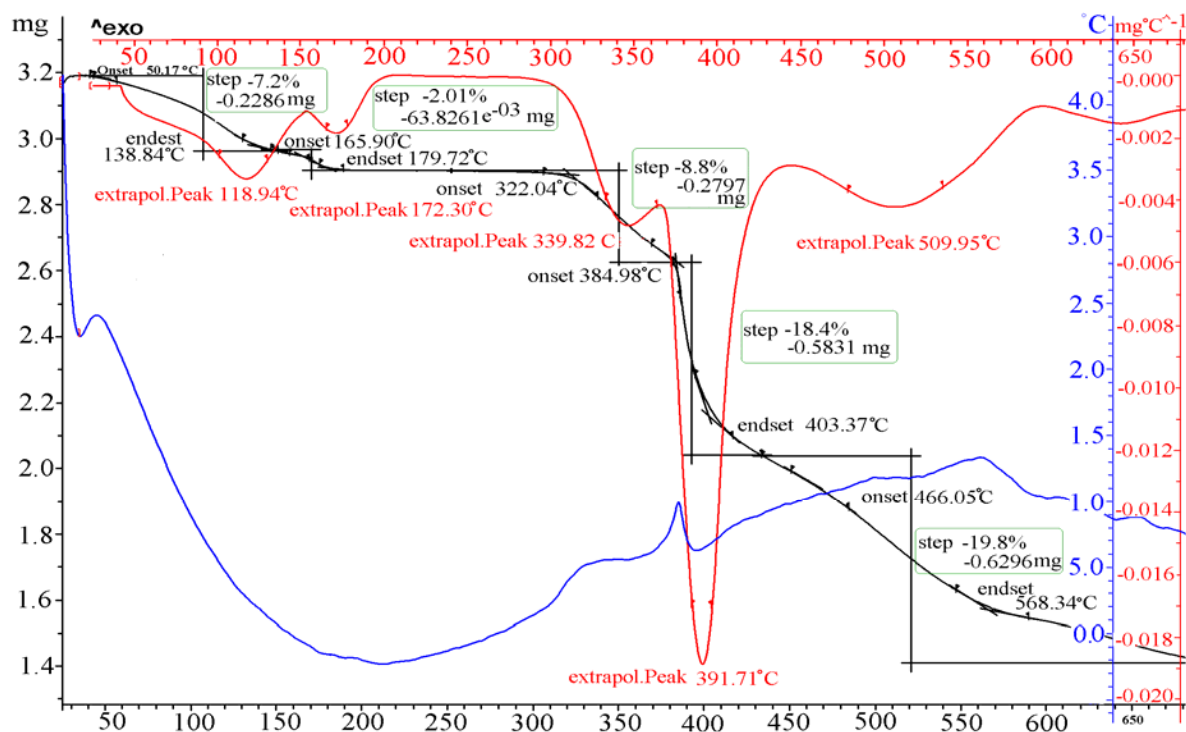

Figure S3. TG, DTG and DTA curves for **3c**.

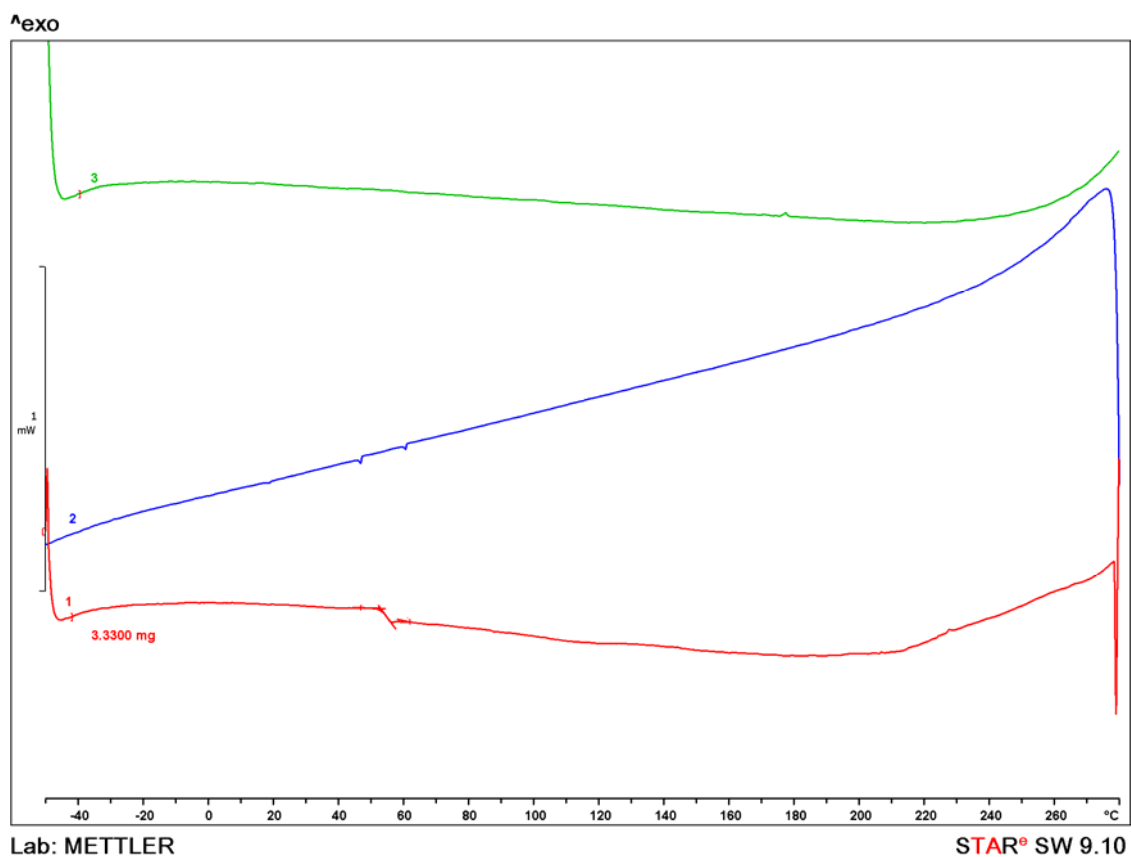

Figure S4. DSC runs for **3a** (heating and cooling rate 10K/min, nitrogen): 1) first heating, 2) first cooling, and 3) 2-nd heating

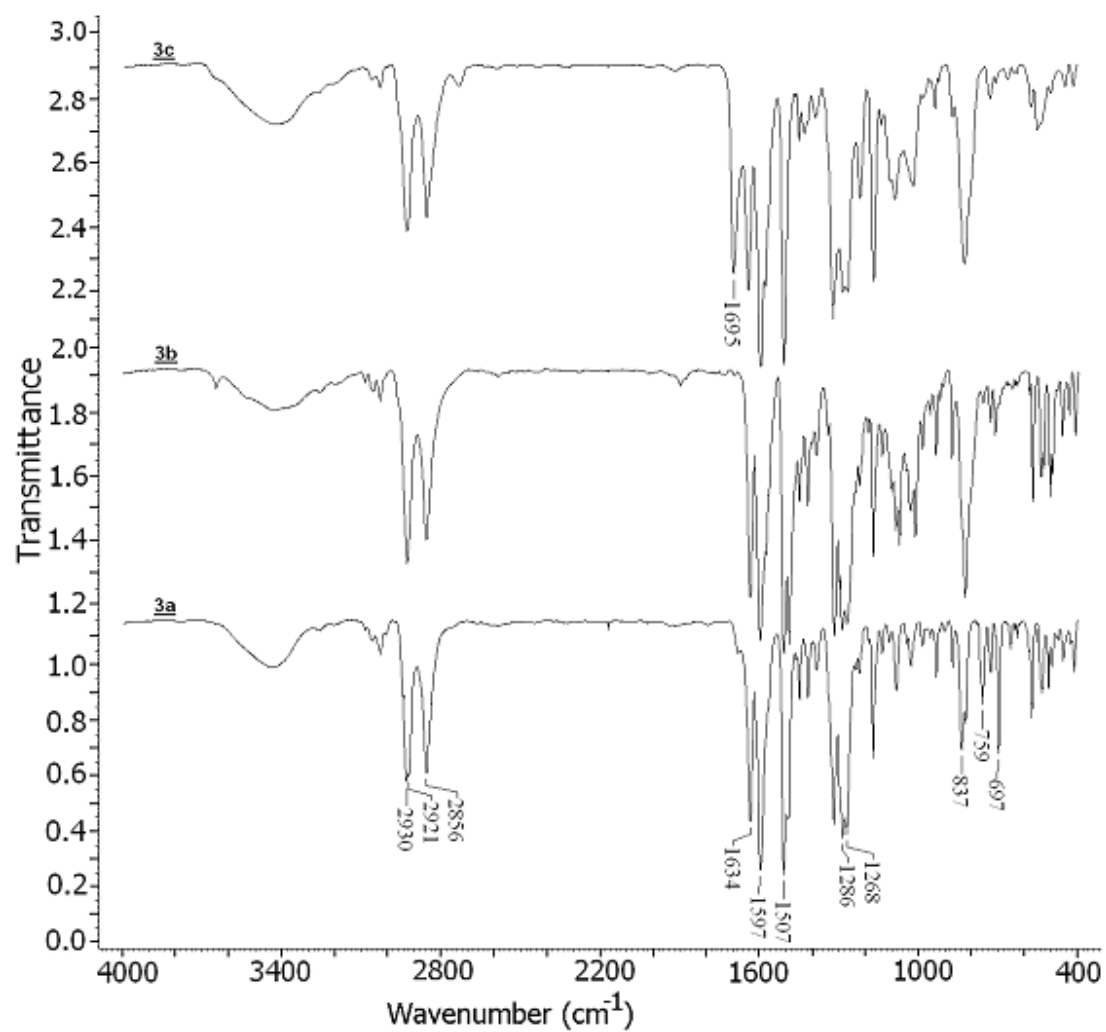

Figure S5: FTIR spectra of triphenylamine-based rhombimines (KBr pellets).

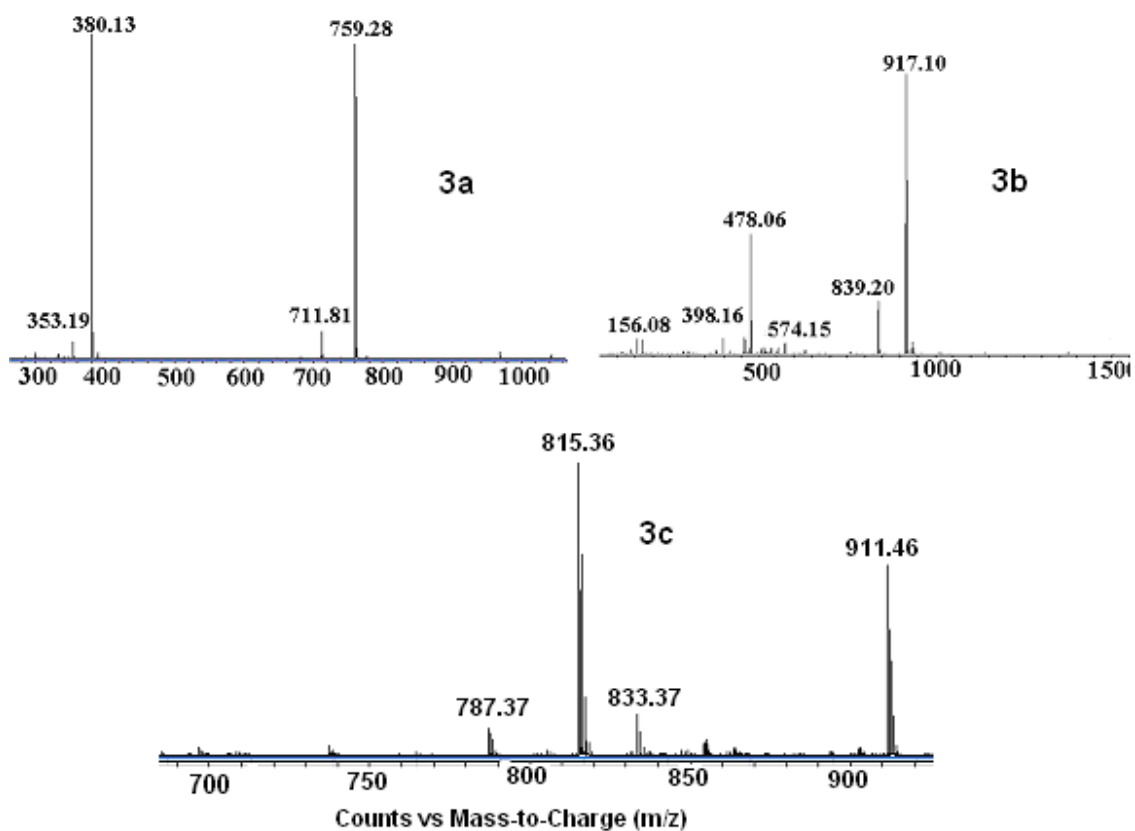

Figure S6: ESI-MS for **3a**, **3b** and **3c**

**3b**: The peak at 478.06 Da could be assigned to the linear [1+1] compound

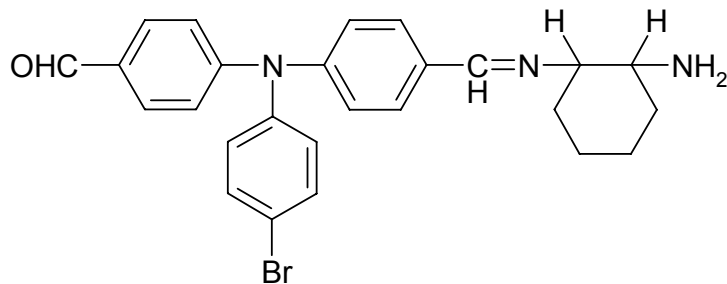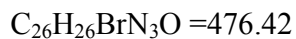

**3c**: The signal positioned at 833.37 Da could be associated to the linear compound ( $M=832$ ), remained as side product from the cyclization step or resulted from hydrolysis of macrocycle **3c**.



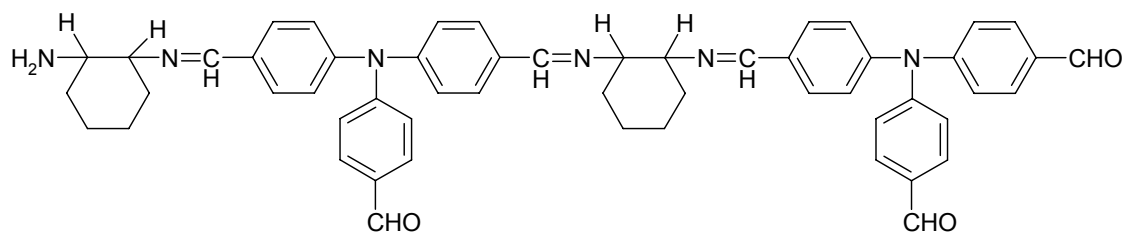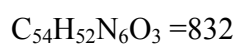

The peak at 911.461 Da could be associated to the [2+3] semi-linear compound having the structure:

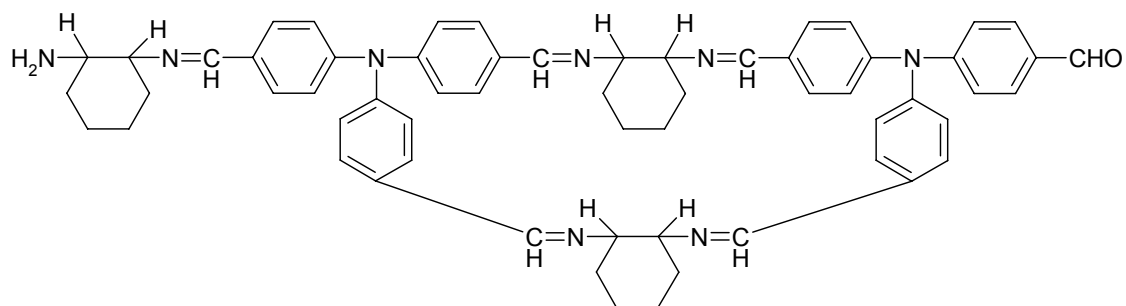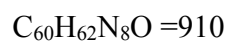



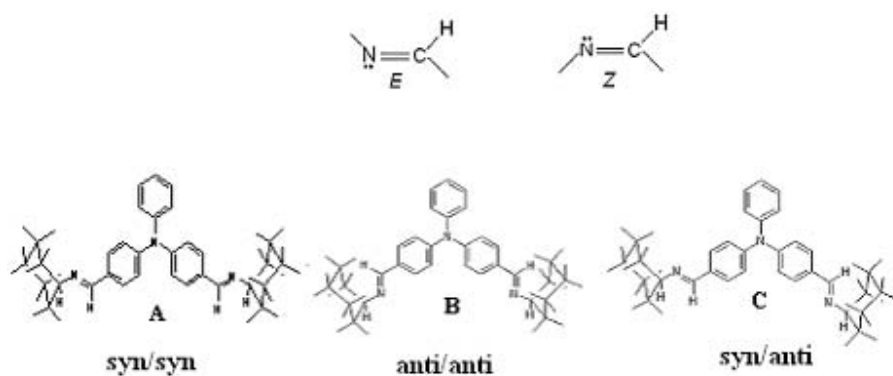

Figure S8. E/Z and *syn/anti* isomers

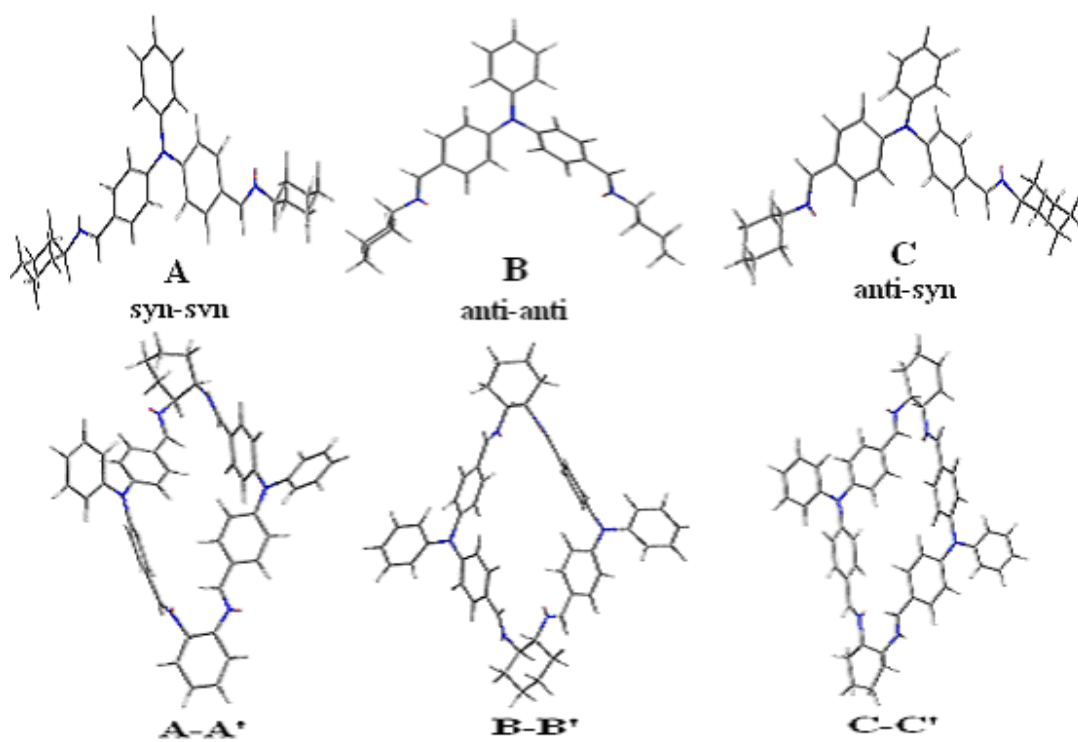

Figure S9. Stereoplot of the MMX force field minimized structure of A, B and C fragments and three macrocycle conformers

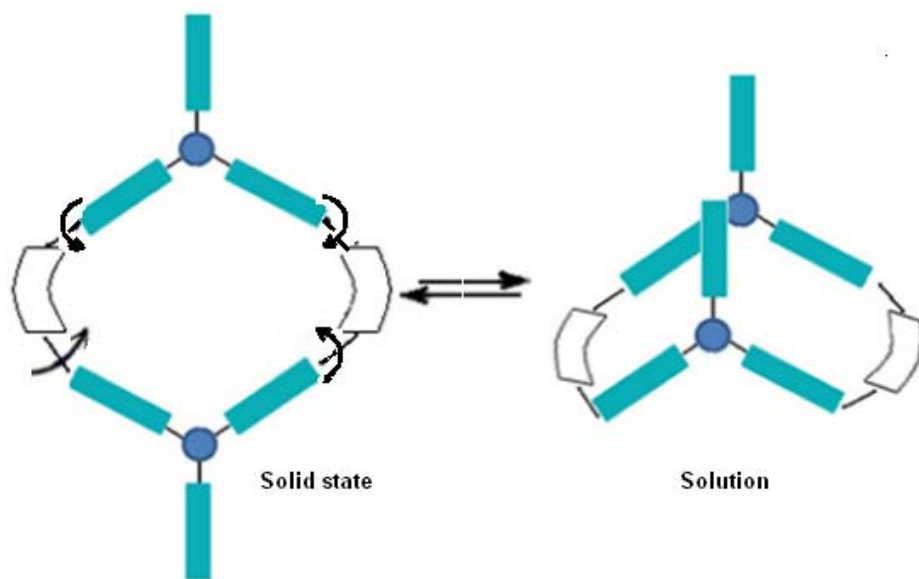

Figure S10. Schematic representation of conformational modification of macrocycle **3a**, **3b** and **3c**

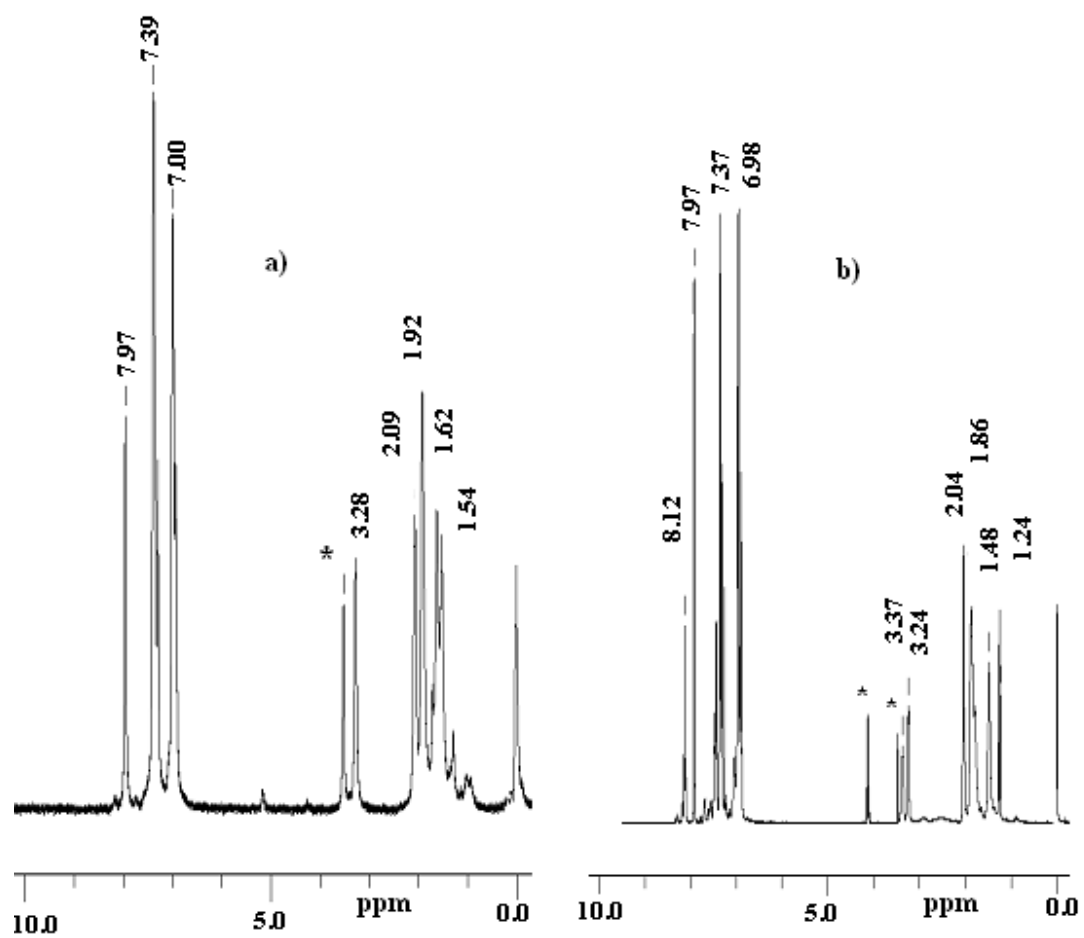

Figure S11.  $^1\text{H-NMR}$  spectrum of **3b** recrystallized (a), and after isomerization (b)  
\*)signals due to impurities.

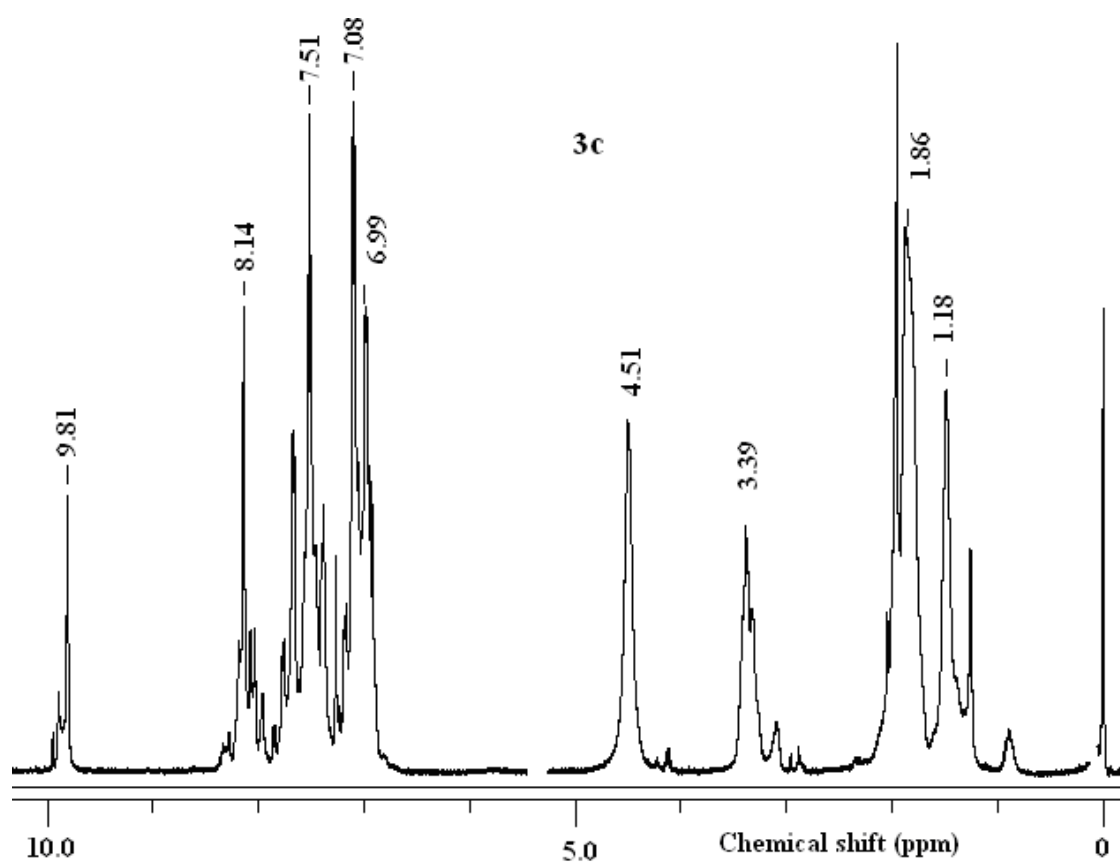

Figure S12. <sup>1</sup>H-NMR spectrum of 3c.

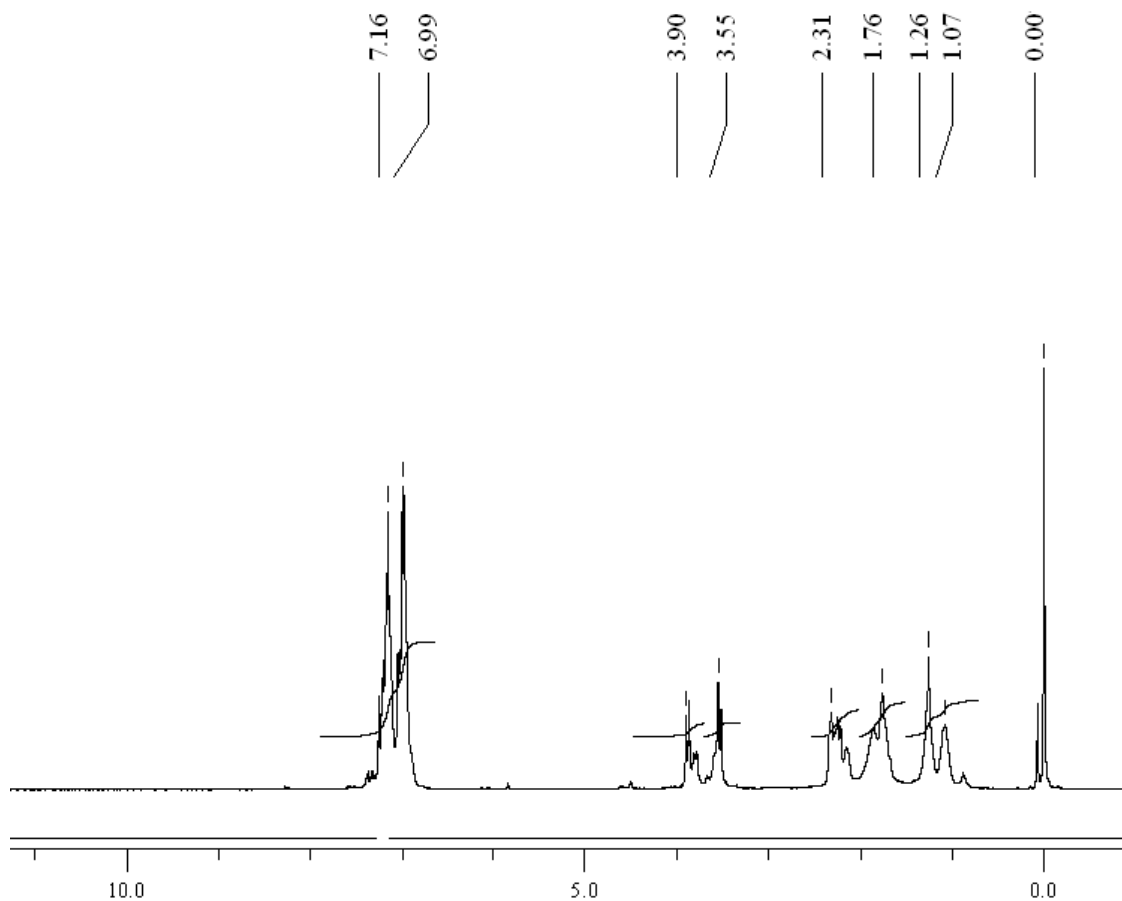

Figure S13.  $^1\text{H-NMR}$  spectrum ( $\text{CDCl}_3$ ) of rhombamine **4a**

#### References

1. M. Grigoras and L. Stafie, *Des. Mon. Polym.*, 2009, **12**, 177-196.
2. T. Mallejol, S. Gmoh, M. A. A. Meziane, M. Blanchard-Desce and O. Mongin, *Synthesis*, 2005, **11**, 1771-1774.
3. G. K. Paul, J. Mwaura, A. A. Argun, P. Taranekar and J. R. Reynolds, *Macromolecules*, 2006, **39**, 7789-7792.
